# Supplementary material for: Rapid fragmentation of microplastics by the freshwater amphipod Gammarus duebeni (Lillj.)
Source: PubMed Central journal article supplement (PMC7393071; doi:10.1038/s41598-020-69635-2), 2020-07-30
Supplement: 41598_2020_69635_MOESM1_ESM.pdf [file 41598_2020_69635_MOESM1_ESM.pdf]

## **Supplementary material**

Rapid fragmentation of microplastics by the freshwater amphipod

*Gammarus duebeni*

Alicia Mateos-Cárdenas *et al.*

(Corresponding author: [alicia.mateoscardenas@ucc.ie](mailto:alicia.mateoscardenas@ucc.ie))

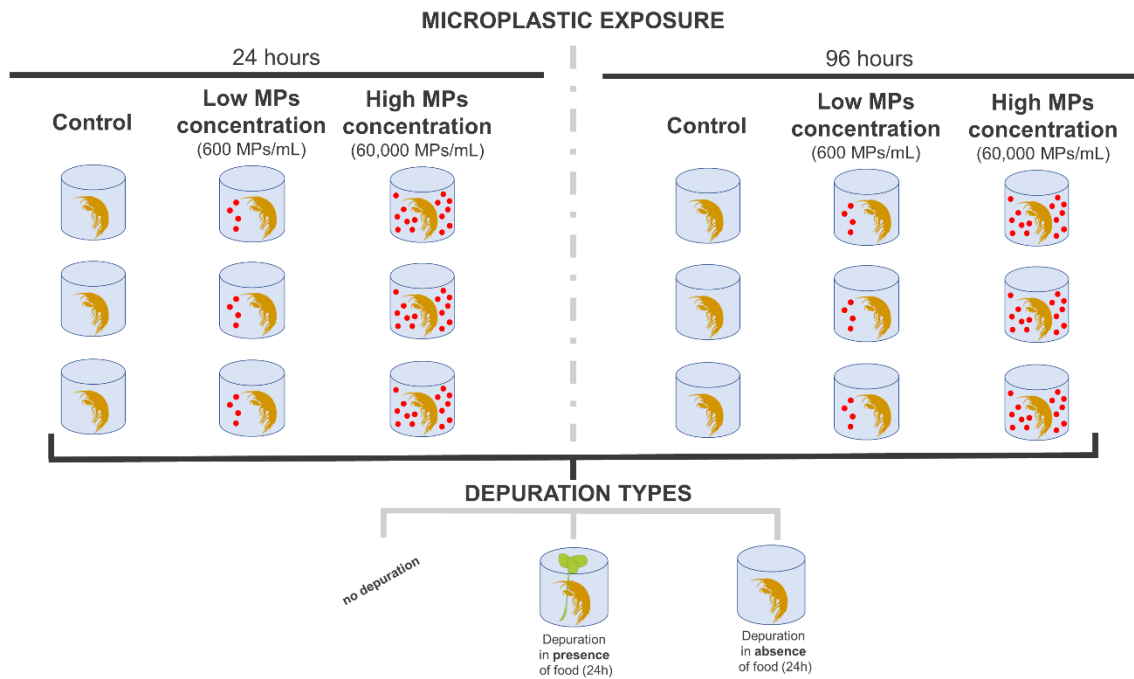

1  
2 **Supplementary Figure S1.** Experimental design showing a graphic overview of the setup for one replicate. Six  
3 replicates were run. All amphipods were exposed individually. The experiment involved a total of 108 amphipods  
4 exposed among two microplastic doses, two different time exposures and three depuration periods. There were N  
5 = 36 control individuals (microplastic free), N = 36 individuals exposed to the low microplastic concentration and N  
6 = 36 individuals exposed to the high microplastic concentration. So, at the end of the test, a total of six *G. duebeni*  
7 had been individually exposed to different treatments consisting in: MPs dose/time/depuration type.  
8

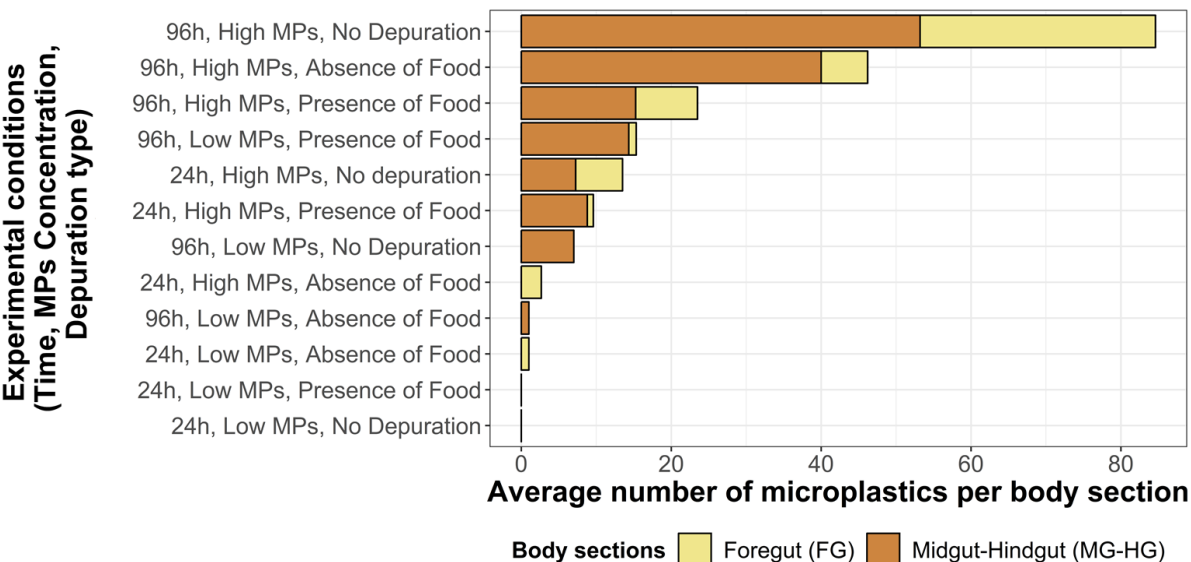

11  
12 **Supplementary Figure S2.** Average number of microplastics present in *G. duebeni* digestive tract sections, and  
13 as a function of different experimental treatments such as: time (24h or 96h exposure to plastics), microplastic  
14 concentration (Low MPs or High MPs) and depuration type (No depuration, 24h depuration in Presence or Absence  
15 of Food). The figure shows the average number of microplastics for each body section ("FG" stands for "Foregut"  
16 and "MG-HG" for "Midgut and Hindgut"). Here data is shown for all amphipods within each treatment. This figure  
17 was produced using the "ggplot2" package in R (v3.4.3).  
18

19 **Supplementary Table S1.** Detailed information on the microplastic (MP) presence and numbers of microplastics  
 20 per *G. duebeni* individual sample according to microplastic dose, time exposure and depuration type. Control  
 21 individuals (microplastic free) are not shown. Median length ( $\mu\text{m}$ ) is given as well as mean  $\pm$  SE length ( $\mu\text{m}$ ).

| Replicate | Sample ID | MPs dose | Time | Depuration       | MP presence in amphipod | Total MPs | Median Length ( $\mu\text{m}$ ) | Mean Length ( $\mu\text{m}$ ) | SE ( $\mu\text{m}$ ) |
|-----------|-----------|----------|------|------------------|-------------------------|-----------|---------------------------------|-------------------------------|----------------------|
| 1         | MP 01     | Low MPs  | 24h  | No depuration    | no                      | 0         | X                               | X                             | X                    |
| 2         | MP 02     | Low MPs  | 24h  | No depuration    | no                      | 0         | X                               | X                             | X                    |
| 3         | MP 03     | Low MPs  | 24h  | No depuration    | no                      | 0         | X                               | X                             | X                    |
| 4         | MP 37     | Low MPs  | 24h  | No depuration    | no                      | 0         | X                               | X                             | X                    |
| 5         | MP 38     | Low MPs  | 24h  | No depuration    | no                      | 0         | X                               | X                             | X                    |
| 6         | MP 39     | Low MPs  | 24h  | No depuration    | no                      | 0         | X                               | X                             | X                    |
| 1         | MP 04     | Low MPs  | 24h  | Presence of food | no                      | 0         | X                               | X                             | X                    |
| 2         | MP 05     | Low MPs  | 24h  | Presence of food | no                      | 0         | X                               | X                             | X                    |
| 3         | MP 06     | Low MPs  | 24h  | Presence of food | no                      | 0         | X                               | X                             | X                    |
| 4         | MP 40     | Low MPs  | 24h  | Presence of food | no                      | 0         | X                               | X                             | X                    |
| 5         | MP 41     | Low MPs  | 24h  | Presence of food | no                      | 0         | X                               | X                             | X                    |
| 6         | MP 42     | Low MPs  | 24h  | Presence of food | mortality               | X         | X                               | X                             | X                    |
| 1         | MP 07     | Low MPs  | 24h  | Absence of food  | no                      | 0         | X                               | X                             | X                    |
| 2         | MP 08     | Low MPs  | 24h  | Absence of food  | no                      | 0         | X                               | X                             | X                    |
| 3         | MP 09     | Low MPs  | 24h  | Absence of food  | no                      | 0         | X                               | X                             | X                    |
| 4         | MP 43     | Low MPs  | 24h  | Absence of food  | yes                     | 1         | 1.58                            | 1.58                          | 0.00                 |
| 5         | MP 44     | Low MPs  | 24h  | Absence of food  | no                      | 0         | X                               | X                             | X                    |
| 6         | MP 45     | Low MPs  | 24h  | Absence of food  | no                      | 0         | X                               | X                             | X                    |
| 1         | MP 20     | Low MPs  | 96h  | No depuration    | yes                     | 1         | 37.83                           | 37.83                         | 0.00                 |
| 2         | MP 21     | Low MPs  | 96h  | No depuration    | mortality               | X         | X                               | X                             | X                    |
| 3         | MP 55     | Low MPs  | 96h  | No depuration    | no                      | 0         | X                               | X                             | X                    |
| 4         | MP 56     | Low MPs  | 96h  | No depuration    | no                      | 0         | X                               | X                             | X                    |
| 5         | MP 57     | Low MPs  | 96h  | No depuration    | no                      | 0         | X                               | X                             | X                    |
| 6         | MP 19     | Low MPs  | 96h  | No depuration    | yes                     | 13        | 36.18                           | 32.04                         | 6.27                 |
| 1         | MP 22     | Low MPs  | 96h  | Presence of food | yes                     | 5         | 4.12                            | 24.24                         | 16.74                |
| 2         | MP 23     | Low MPs  | 96h  | Presence of food | mortality               | X         | X                               | X                             | X                    |
| 3         | MP 24     | Low MPs  | 96h  | Presence of food | yes                     | 1         | 40.99                           | 40.99                         | 0.00                 |
| 4         | MP 58     | Low MPs  | 96h  | Presence of food | no                      | 0         | X                               | X                             | X                    |
| 5         | MP 59     | Low MPs  | 96h  | Presence of food | yes                     | 40        | 2.71                            | 4.95                          | 1.12                 |
| 6         | MP 60     | Low MPs  | 96h  | Presence of food | no                      | 0         | X                               | X                             | X                    |
| 1         | MP 25     | Low MPs  | 96h  | Absence of food  | no                      | 0         | X                               | X                             | X                    |
| 2         | MP 26     | Low MPs  | 96h  | Absence of food  | yes                     | 1         | 45.62                           | 45.62                         | 0.00                 |
| 3         | MP 27     | Low MPs  | 96h  | Absence of food  | yes                     | 1         | 34.44                           | 34.44                         | 0.00                 |
| 4         | MP 61     | Low MPs  | 96h  | Absence of food  | no                      | 0         | X                               | X                             | X                    |
| 5         | MP 62     | Low MPs  | 96h  | Absence of food  | no                      | 0         | X                               | X                             | X                    |
| 6         | MP 63     | Low MPs  | 96h  | Absence of food  | no                      | 0         | X                               | X                             | X                    |
| 1         | MP 10     | High MPs | 24h  | No depuration    | no                      | 0         | X                               | X                             | X                    |
| 2         | MP 11     | High MPs | 24h  | No depuration    | yes                     | 29        | 43.10                           | 48.62                         | 8.20                 |
| 3         | MP 12     | High MPs | 24h  | No depuration    | yes                     | 9         | 32.42                           | 33.19                         | 4.31                 |
| 4         | MP 46     | High MPs | 24h  | No depuration    | yes                     | 12        | 5.36                            | 12.86                         | 3.47                 |
| 5         | MP 47     | High MPs | 24h  | No depuration    | yes                     | 4         | 16.81                           | 19.69                         | 7.48                 |
| 6         | MP 48     | High MPs | 24h  | No depuration    | no                      | 0         | X                               | X                             | X                    |
| 1         | MP 13     | High MPs | 24h  | Presence of food | no                      | 0         | X                               | X                             | X                    |
| 2         | MP 14     | High MPs | 24h  | Presence of food | yes                     | 7         | 33.16                           | 35.50                         | 1.87                 |
| 3         | MP 15     | High MPs | 24h  | Presence of food | yes                     | 14        | 2.77                            | 9.39                          | 3.83                 |
| 4         | MP 49     | High MPs | 24h  | Presence of food | yes                     | 1         | 42.96                           | 42.96                         | 0.00                 |
| 5         | MP 50     | High MPs | 24h  | Presence of food | yes                     | 22        | 2.17                            | 15.16                         | 4.50                 |
| 6         | MP 51     | High MPs | 24h  | Presence of food | yes                     | 3         | 43.67                           | 47.06                         | 4.97                 |
| 1         | MP 16     | High MPs | 24h  | Absence of food  | no                      | 0         | X                               | X                             | X                    |
| 2         | MP 17     | High MPs | 24h  | Absence of food  | yes                     | 3         | 27.76                           | 29.90                         | 5.44                 |
| 3         | MP 18     | High MPs | 24h  | Absence of food  | yes                     | 4         | 30.93                           | 47.96                         | 20.45                |
| 4         | MP 52     | High MPs | 24h  | Absence of food  | yes                     | 1         | 42.15                           | 42.15                         | 0.00                 |
| 5         | MP 53     | High MPs | 24h  | Absence of food  | no                      | 0         | X                               | X                             | X                    |
| 6         | MP 54     | High MPs | 24h  | Absence of food  | no                      | 0         | X                               | X                             | X                    |
| 1         | MP 34     | High MPs | 96h  | No depuration    | yes                     | 116       | 38.65                           | 37.62                         | 0.74                 |
| 2         | MP 35     | High MPs | 96h  | No depuration    | yes                     | 103       | 34.04                           | 35.37                         | 2.56                 |
| 3         | MP 36     | High MPs | 96h  | No depuration    | yes                     | 24        | 17.27                           | 25.01                         | 4.50                 |
| 4         | MP 64     | High MPs | 96h  | No depuration    | yes                     | 17        | 35.98                           | 40.98                         | 8.94                 |
| 5         | MP 65     | High MPs | 96h  | No depuration    | yes                     | 161       | 38.74                           | 38.62                         | 2.04                 |
| 6         | MP 66     | High MPs | 96h  | No depuration    | mortality               | X         | X                               | X                             | X                    |
| 1         | MP 31     | High MPs | 96h  | Presence of food | yes                     | 2         | 48.02                           | 48.02                         | 43.68                |
| 2         | MP 32     | High MPs | 96h  | Presence of food | yes                     | 71        | 14.95                           | 21.74                         | 2.41                 |
| 3         | MP 33     | High MPs | 96h  | Presence of food | yes                     | 16        | 54.71                           | 66.11                         | 9.26                 |
| 4         | MP 67     | High MPs | 96h  | Presence of food | Yes                     | 6         | 34.69                           | 44.89                         | 19.78                |
| 5         | MP 68     | High MPs | 96h  | Presence of food | no                      | 0         | X                               | X                             | X                    |
| 6         | MP 69     | High MPs | 96h  | Presence of food | no                      | 0         | X                               | X                             | X                    |
| 1         | MP 28     | High MPs | 96h  | Absence of food  | yes                     | 3         | 6.38                            | 9.50                          | 5.57                 |
| 2         | MP 29     | High MPs | 96h  | Absence of food  | yes                     | 144       | 31.70                           | 33.50                         | 2.06                 |
| 3         | MP 30     | High MPs | 96h  | Absence of food  | yes                     | 139       | 43.97                           | 48.03                         | 2.07                 |
| 4         | MP 70     | High MPs | 96h  | Absence of food  | Yes                     | 18        | 45.07                           | 49.57                         | 5.64                 |
| 5         | MP 71     | High MPs | 96h  | Absence of food  | Yes                     | 2         | 49.13                           | 49.13                         | 11.08                |
| 6         | MP 72     | High MPs | 96h  | Absence of food  | no                      | 0         | X                               | X                             | X                    |

25 **Supplementary Table S2.** Number of microplastics and their average size in  $\mu\text{m}$  (mean  $\pm$  standard error) according  
 26 to shape type, *G. duebeni*'s body part and depuration type. Independent replicates were run (R=6) with a total of  
 27 96 amphipods tested of which 36 belonged to the control (microplastic free) group. 'Total N of amphipods' in the  
 28 table show the number of amphipods/body section that had accumulated microspheres and/or fragments.

| NO DEPURATION          |           |                                    |                                  |               |                                |                                  |             |                               |         |                              |
|------------------------|-----------|------------------------------------|----------------------------------|---------------|--------------------------------|----------------------------------|-------------|-------------------------------|---------|------------------------------|
| Foregut                |           |                                    |                                  |               |                                |                                  |             |                               |         |                              |
|                        |           | Total N of MPs among all amphipods | N amphipods with MPs in foreguts | Mean MPs/Amph | Mean MP size ( $\mu\text{m}$ ) | $\pm\text{SE}$ ( $\mu\text{m}$ ) |             | Total N of MPs per shape type |         | Total N of MP/foregut        |
| Microsphere            | Spherical | 138                                | 6                                | 23.00         | 36.50                          | 1.97                             | Microsphere | 138                           | All MPs | 181                          |
| Fragment               | Small     | 26                                 | 6                                | 4.33          | 8.89                           | 0.18                             | Fragment    | 43                            |         |                              |
|                        | Flat      | 7                                  | 1                                | 7.00          | 68.97                          | 0.05                             |             |                               |         |                              |
|                        | Cracked   | 10                                 | 3                                | 3.33          | 55.17                          | 0.06                             |             |                               |         |                              |
| Midgut and hindgut     |           |                                    |                                  |               |                                |                                  |             |                               |         |                              |
|                        |           | Total N of MPs among all amphipods | N amphipods with MPs in foreguts | Mean MPs/Amph | Mean MP size ( $\mu\text{m}$ ) | $\pm\text{SE}$ ( $\mu\text{m}$ ) |             | Total N of MPs per shape type |         | Total N of MP/midgut-hindgut |
| Microsphere            | Spherical | 107                                | 6                                | 17.83         | 35.47                          | 1.52                             | Microsphere | 107                           | All MPs | 308                          |
| Fragment               | Irregular | 86                                 | 8                                | 10.75         | 15.63                          | 2.19                             | Fragment    | 201                           |         |                              |
|                        | Flat      | 12                                 | 3                                | 4.00          | 104.39                         | 11.42                            |             |                               |         |                              |
|                        | Cracked   | 103                                | 6                                | 17.17         | 50.21                          | 2.86                             |             |                               |         |                              |
| TOTAL MP/all amphipods |           | 489                                |                                  |               |                                |                                  |             |                               |         |                              |

| DEPURATION IN PRESENCE OF FOOD |           |                                    |                                  |               |                                |                                  |             |                               |         |                              |
|--------------------------------|-----------|------------------------------------|----------------------------------|---------------|--------------------------------|----------------------------------|-------------|-------------------------------|---------|------------------------------|
| Foregut                        |           |                                    |                                  |               |                                |                                  |             |                               |         |                              |
|                                |           | Total N of MPs among all amphipods | N amphipods with MPs in foreguts | Mean MPs/Amph | Mean MP size ( $\mu\text{m}$ ) | $\pm\text{SE}$ ( $\mu\text{m}$ ) |             | Total N of MPs per shape type |         | Total N of MP/foregut        |
| Microsphere                    | Spherical | 10                                 | 4                                | 2.50          | 39.12                          | 4.32                             | Microsphere | 10                            | All MPs | 40                           |
| Fragment                       | Irregular | 25                                 | 3                                | 8.33          | 5.03                           | 2.69                             | Fragment    | 30                            |         |                              |
|                                | Flat      | 0                                  | 0                                | 0.00          | 0.00                           | 0.00                             |             |                               |         |                              |
|                                | Cracked   | 5                                  | 1                                | 5.00          | 26.91                          | 6.12                             |             |                               |         |                              |
| Midgut and hindgut             |           |                                    |                                  |               |                                |                                  |             |                               |         |                              |
|                                |           | Total N of MPs among all amphipods | N amphipods with MPs in foreguts | Mean MPs/Amph | Mean MP size ( $\mu\text{m}$ ) | $\pm\text{SE}$ ( $\mu\text{m}$ ) |             | Total N of MPs per shape type |         | Total N of MP/midgut-hindgut |
| Microsphere                    | Spherical | 14                                 | 6                                | 2.33          | 36.31                          | 5.28                             | Microsphere | 14                            | All MPs | 148                          |
| Fragment                       | Irregular | 66                                 | 6                                | 11.00         | 4.19                           | 2.49                             | Fragment    | 134                           |         |                              |
|                                | Flat      | 43                                 | 4                                | 10.75         | 40.02                          | 4.41                             |             |                               |         |                              |
|                                | Cracked   | 25                                 | 8                                | 3.13          | 42.37                          | 7.13                             |             |                               |         |                              |
| TOTAL MP/all amphipods         |           | 188                                |                                  |               |                                |                                  |             |                               |         |                              |

| DEPURATION IN ABSENCE OF FOOD |           |                                    |                                  |               |                                |                                  |             |                               |         |                              |
|-------------------------------|-----------|------------------------------------|----------------------------------|---------------|--------------------------------|----------------------------------|-------------|-------------------------------|---------|------------------------------|
| Foregut                       |           |                                    |                                  |               |                                |                                  |             |                               |         |                              |
|                               |           | Total N of MPs among all amphipods | N amphipods with MPs in foreguts | Mean MPs/Amph | Mean MP size ( $\mu\text{m}$ ) | $\pm\text{SE}$ ( $\mu\text{m}$ ) |             | Total N of MPs per shape type |         | Total N of MP/foregut        |
| Microsphere                   | Spherical | 20                                 | 6                                | 3.33          | 38.74                          | 1.69                             | Microsphere | 20                            | All MPs | 40                           |
| Fragment                      | Irregular | 7                                  | 4                                | 1.75          | 9.13                           | 4.23                             | Fragment    | 20                            |         |                              |
|                               | Flat      | 1                                  | 1                                | 1.00          | 108.90                         | 0.00                             |             |                               |         |                              |
|                               | Cracked   | 12                                 | 4                                | 3.00          | 59.77                          | 8.76                             |             |                               |         |                              |
| Midgut and hindgut            |           |                                    |                                  |               |                                |                                  |             |                               |         |                              |
|                               |           | Total N of MPs among all amphipods | N amphipods with MPs in foreguts | Mean MPs/Amph | Mean MP size ( $\mu\text{m}$ ) | $\pm\text{SE}$ ( $\mu\text{m}$ ) |             | Total N of MPs per shape type |         | Total N of MP/midgut-hindgut |
| Microsphere                   | Spherical | 52                                 | 6                                | 8.67          | 34.29                          | 1.71                             | Microsphere | 52                            | All MPs | 277                          |
| Fragment                      | Irregular | 26                                 | 3                                | 8.67          | 4.73                           | 1.07                             | Fragment    | 225                           |         |                              |
|                               | Flat      | 53                                 | 2                                | 26.50         | 43.56                          | 40.40                            |             |                               |         |                              |
|                               | Cracked   | 146                                | 4                                | 36.50         | 48.12                          | 5.10                             |             |                               |         |                              |
| TOTAL MP/all amphipods        |           | 317                                |                                  |               |                                |                                  |             |                               |         |                              |

29  
 30  
 31 **Supplementary Table S3.** Most common microplastic shape type found in *G. duebeni* body sections according to  
 32 depuration types. Sizes are given in mean  $\pm$  SE.

|                                | Foreguts         |                                |       | Midguts-Hindguts |                                |       |
|--------------------------------|------------------|--------------------------------|-------|------------------|--------------------------------|-------|
|                                | Shape type       | Size                           | Total | Shape type       | Size                           | Total |
| No depuration                  | Intact spherical | 36.50 $\mu\text{m}$ $\pm$ 1.97 | 138   | Intact spherical | 35.47 $\mu\text{m}$ $\pm$ 1.52 | 107   |
| Depuration in presence of food | Small irregular  | 5.03 $\mu\text{m}$ $\pm$ 2.69  | 25    | Small irregular  | 4.19 $\mu\text{m}$ $\pm$ 2.49  | 66    |
| Depuration in absence of food  | Intact spherical | 38.74 $\mu\text{m}$ $\pm$ 1.69 | 20    | Cracked          | 48.12 $\mu\text{m}$ $\pm$ 5.10 | 146   |

33  
 34  
 35 In the absence of depuration, the most common microplastic shape in *G. duebeni* foregut sections was  
 36 the intact spherical microplastic type (a total of 138 microplastics of an average size of 36.50  $\pm$  1.97  
 37  $\mu\text{m}$ , **Table S3**). After depuration in the presence of food, the most common shape in foreguts was the  
 38 small irregular microplastic fragment type (25 microplastics of an average size of 5.03  $\pm$  2.69  $\mu\text{m}$ , **Table**

39 **S2)**. Following depuration in absence of food, the most common shape in foreguts was the whole  
40 spherical microplastic (20 microplastics of an average size of  $38.74 \pm 1.69 \mu\text{m}$ , **Table S3**).

41 Likewise, in the absence of depuration, the most common microplastic shape in midguts-hindguts was  
42 the whole spherical microplastic type (a total of 107 microplastics of an average size of  $35.47 \pm 1.52$   
43  $\mu\text{m}$ , **Table S3**) though in very similar numbers to cracked fragments (a total of 103 microplastics of an  
44 average size of  $50.21 \pm 2.86 \mu\text{m}$ ). After depuration in the presence of food, the most common shape in  
45 midguts-hindguts were also small irregular fragments (a total of 66) of an average size of  $4.19 \pm 2.49$   
46  $\mu\text{m}$ , **Table S3**). After depuration in the absence of food, the most common shape in midguts-hindguts  
47 were cracked fragments (a total of 146) of an average size of  $48.12 \pm 5.10 \mu\text{m}$ , **Table S3**).

48  
49  
50

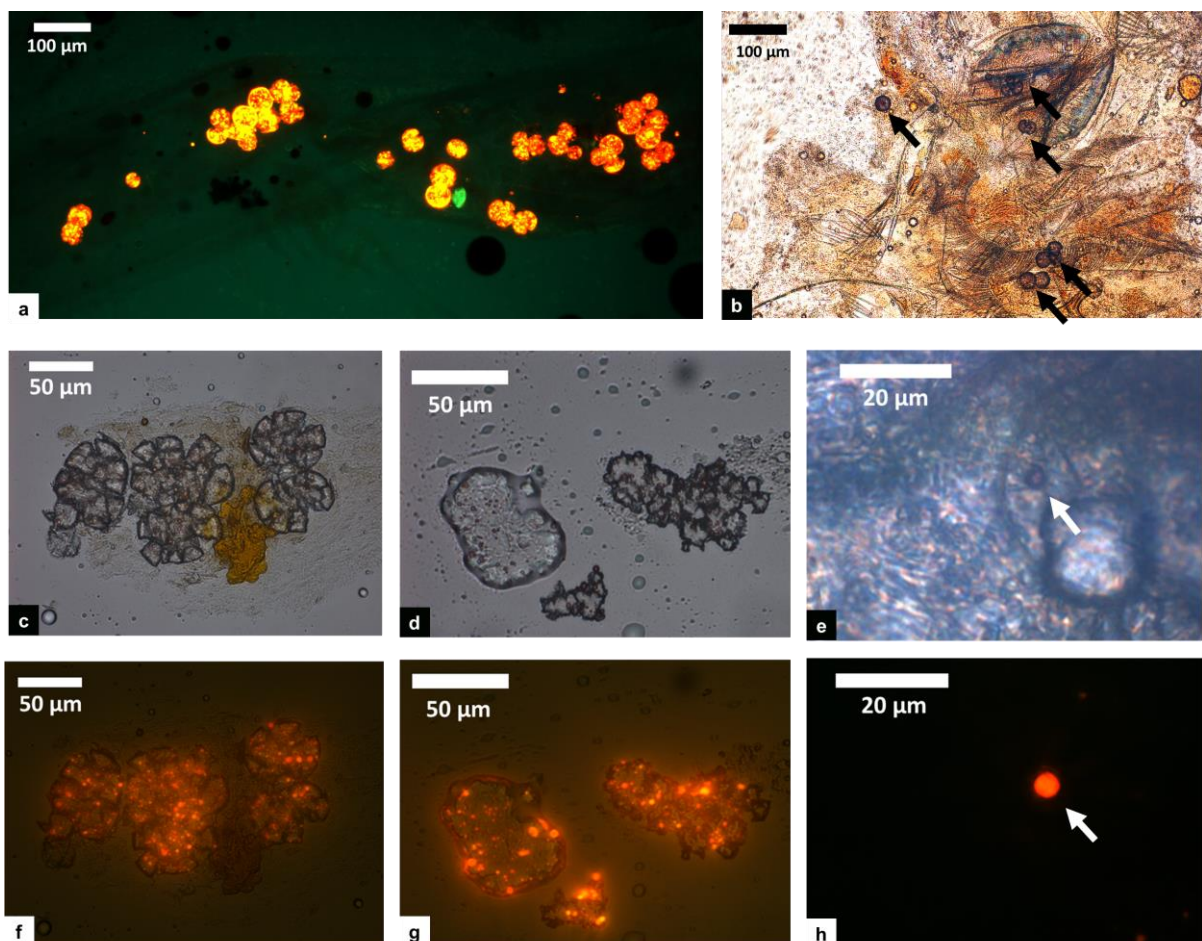

51 **Supplementary Figure S3:** Cracked and fragmented plastic particles from *G. duebeni* guts at 10x, 40x or 100x  
52 magnification under fluorescence and/or light microscopy; **(a)** microplastics in midgut-hindgut under UV  
53 fluorescence at 10x, **(b)** microplastics in foregut under light microscopy at 10x, **(c)** cracked microplastics under light  
54 microscopy at 40x, **(d)** flat microplastics under light microscopy at 40x, **(e)** small-irregular microplastics under light  
55 microscopy at 100x, **(f)** cracked microplastics under UV fluorescence at 40x, **(g)** flat microplastics under UV  
56 fluorescence at 40x and **(h)** small-irregular microplastics under UV fluorescence at 100x.  
57



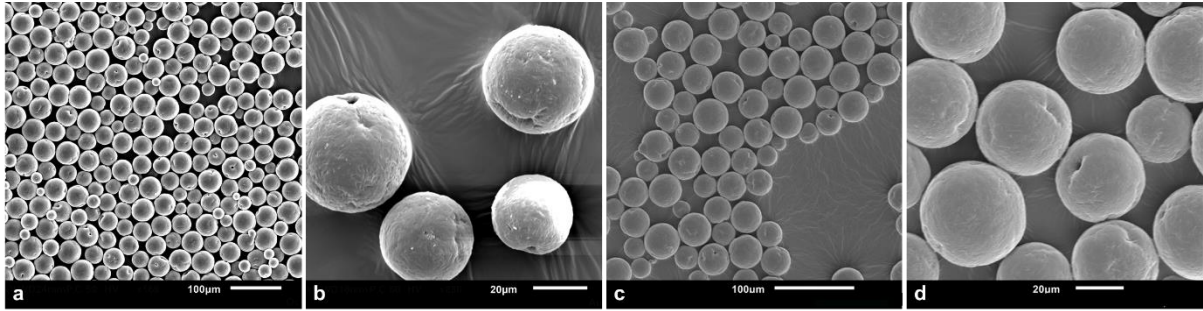

58  
59  
60  
61  
62  
63

**Supplementary Figure S4.** Scanning electron microscopy (SEM) images of (a) microplastic stock in Tween solution as used in bioassays, (b) microplastic stock as dry powder provided by the supplier, (c) microplastics frozen at -80°C for seven days in distilled water and (d) microplastics frozen at -80°C for seven days in Tween solution.

64  
65

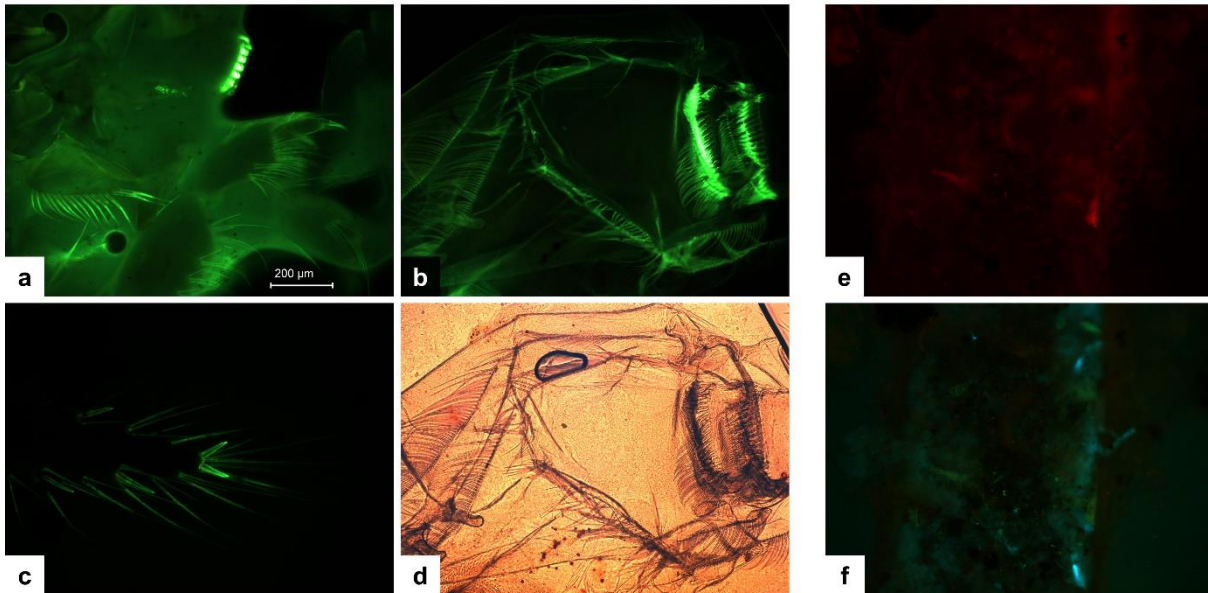

66  
67  
68  
69  
70

**Supplementary Figure S5.** Microscope images showing the biological autofluorescence of control *G. duebeni* exoskeleton or mandible tissues (a,b,c) under fluorescence green light or brightfield (d) and *G. duebeni* gut tissues (e,f) showing biological autofluorescence under green light (e) or UV light (f). All images show tissues from control individuals, not exposed to microplastics or fluorescence dyes.

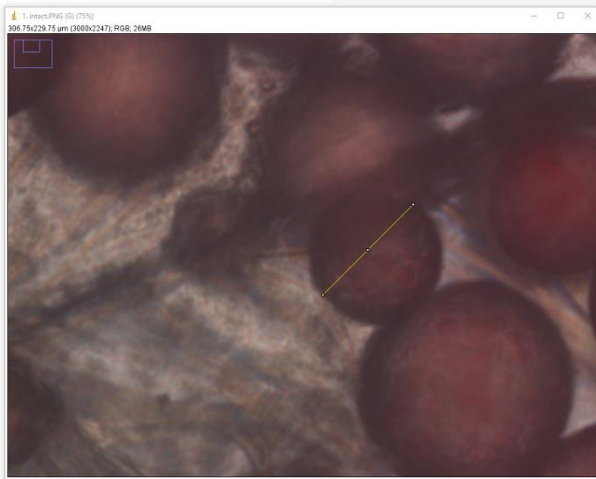

| File | Edit  | Font   | Results |        |        |        |        |
|------|-------|--------|---------|--------|--------|--------|--------|
| Area | Mean  | StdDev | Min     | Max    | Angle  | Length |        |
| 1    | 3.021 | 66.606 | 4.910   | 93.979 | 76.612 | 45     | 29.499 |

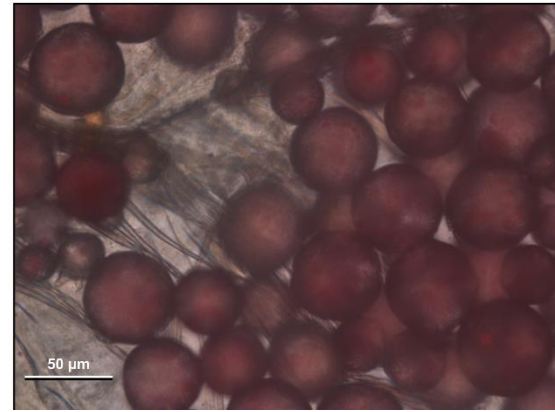

71  
72  
73  
74

**a**

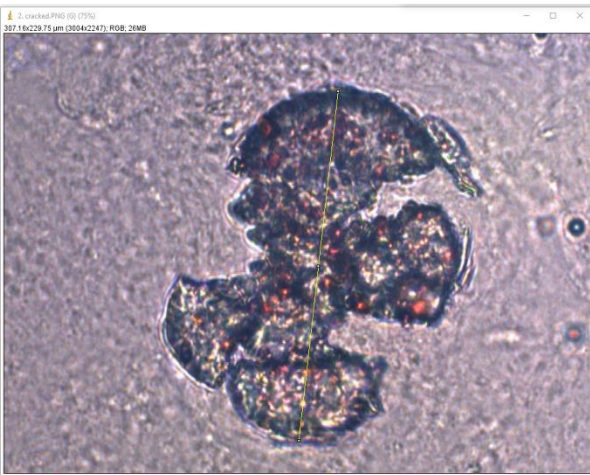

| File | Edit  | Font    | Results |        |         |        |        |
|------|-------|---------|---------|--------|---------|--------|--------|
| Area | Mean  | StdDev  | Min     | Max    | Angle   | Length |        |
| 1    | 8.364 | 106.399 | 36.601  | 56.617 | 251.708 | 83.533 | 81.706 |

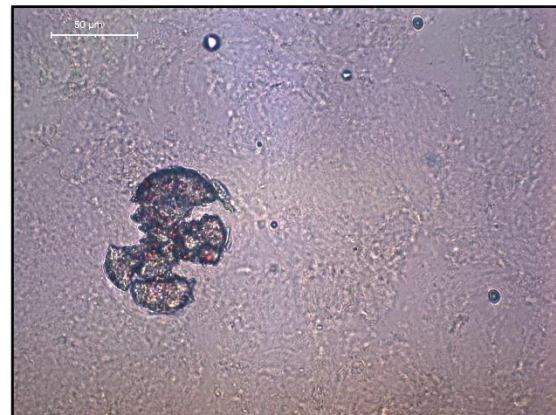

75

**b**

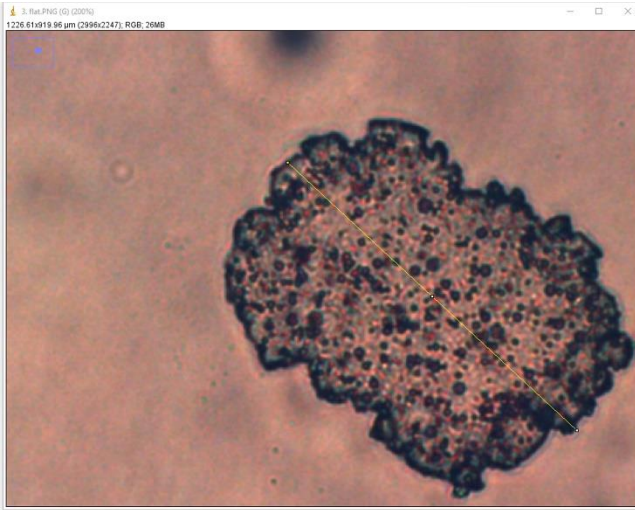

| File | Edit   | Font   | Results |        |         |         |         |
|------|--------|--------|---------|--------|---------|---------|---------|
| Area | Mean   | StdDev | Min     | Max    | Angle   | Length  |         |
| 1    | 52.298 | 97.529 | 30.696  | 30.931 | 163.902 | -42.782 | 127.186 |

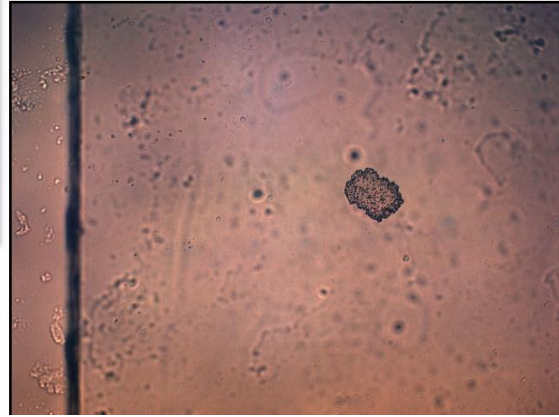

76  
77  
78  
79

**c**

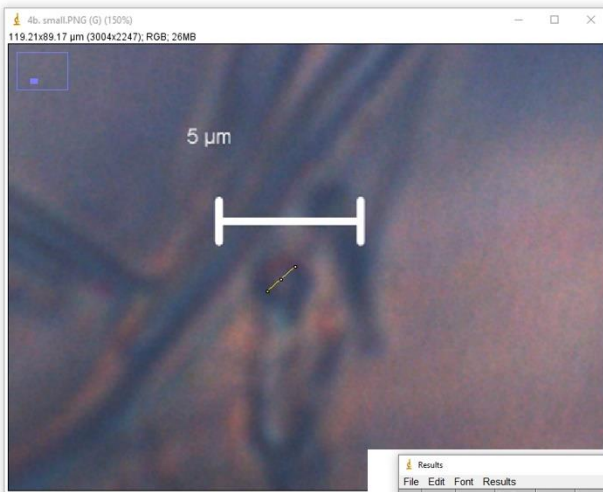

| File | Edit  | Font   | Results |        |        |        |       |
|------|-------|--------|---------|--------|--------|--------|-------|
| Area | Mean  | StdDev | Min     | Max    | Angle  | Length |       |
| 1    | 0.050 | 83.369 | 5.447   | 74.281 | 93.336 | 42.397 | 1.236 |

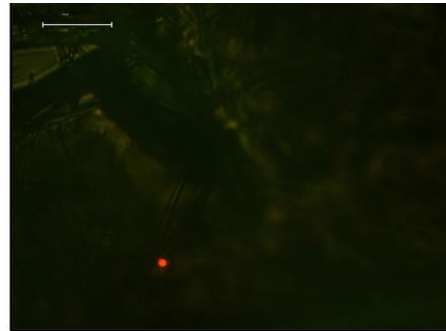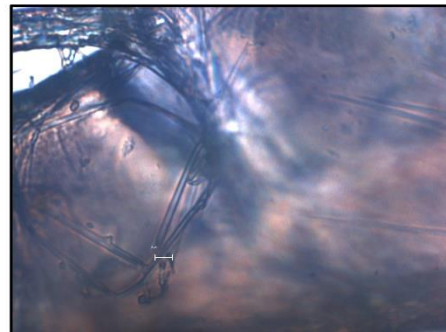

80  
81  
82  
83

**d**

**Supplementary Figure S6.** ImageJ measurements of (a) an intact microsphere, (b) a cracked fragment, (c) a flat fragment and (d) a small fragment. Longest length/diameter was measured.
